# Supplementary material for: Construction of five Zn(ii)/Cd(ii) coordination polymers derived from a new linear carboxylate/pyridyl ligand: design, synthesis, and photocatalytic properties
Source: Royal Society of Chemistry journal article supplement (doi:10.1039/c6dt02312f), 2016-01-01
Supplement: c6dt02312f1.pdf [file c6dt02312f1.pdf]

## **Electronic Supplementary Information**

### **Construction of five Zn(II)/Cd(II) coordination polymers derived from a new linear carboxylate/pyridyl ligand: Design, synthesis, and photocatalytic properties**

**Lei-Lei Liu,<sup>\*a</sup> Cai-Xia Yu,<sup>a</sup> Ji-Min Du,<sup>a</sup> Shi-Min Liu,<sup>a</sup> Jing-Shuai Cao<sup>a</sup> and Lu-Fang Ma<sup>\*b</sup>**

<sup>a</sup> *College of Chemistry and Chemical Engineering, Henan Province Key Laboratory of New Optoelectronic Functional Materials, Anyang Normal University, Anyang 455000, Henan, P. R. China*

<sup>b</sup> *College of Chemistry and Chemical Engineering, Luoyang Normal University, Luoyang 471022, Henan, P. R. China*

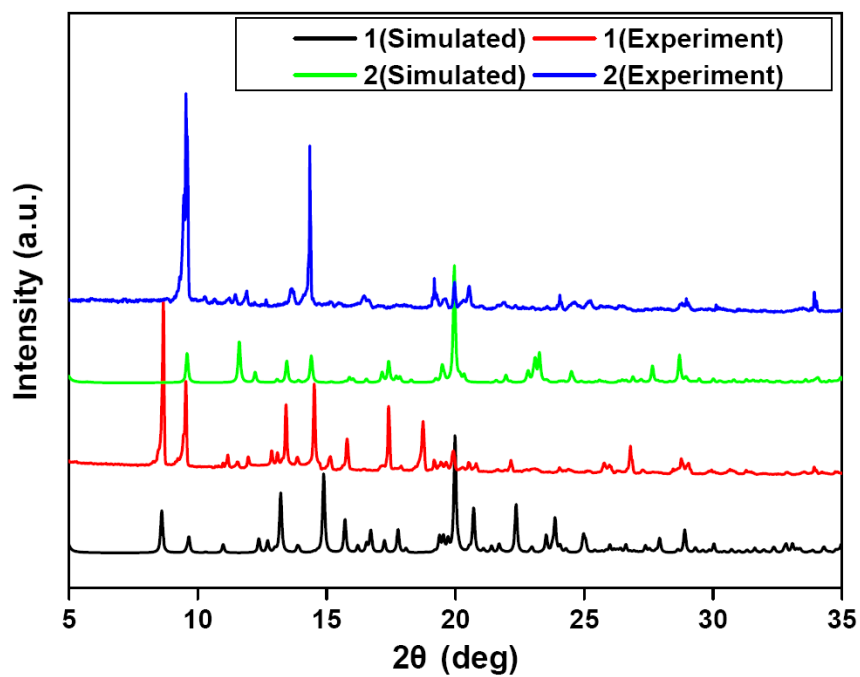

**Figure S1.** Experimental and simulated PXRD patterns for **1–2**.

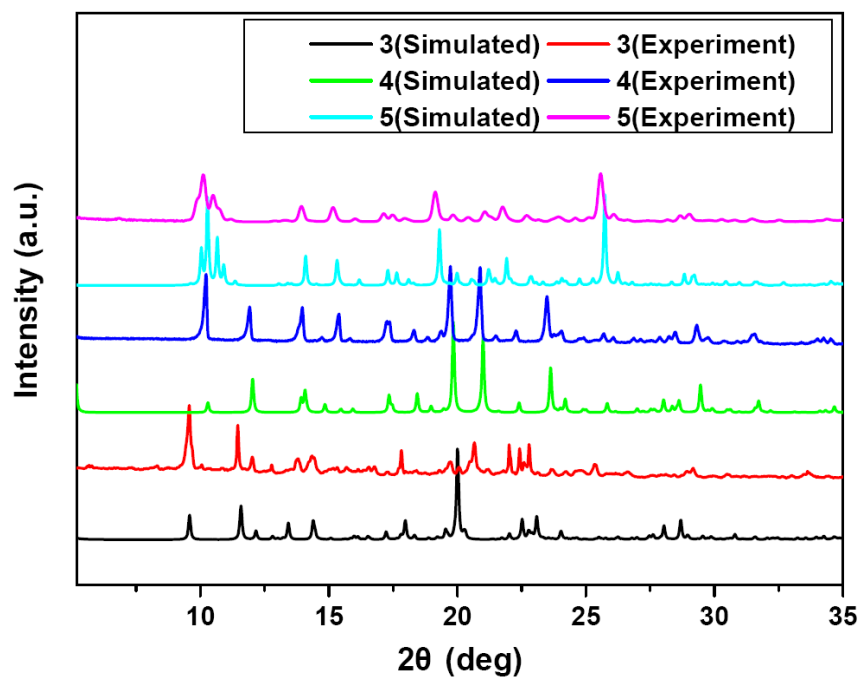

**Figure S2.** Experimental and simulated PXRD patterns for **3–5**.

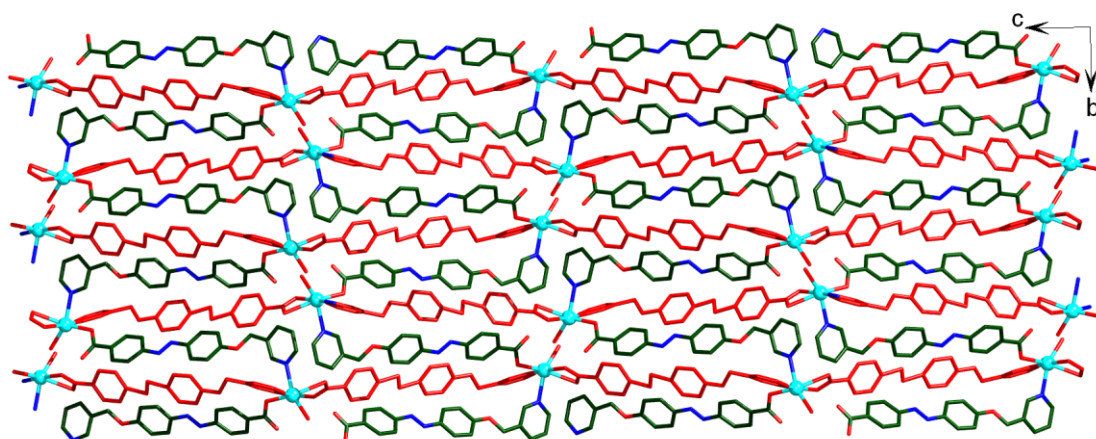

**Figure S3.** View of the 2D network in **1** extending along *bc* plane.

(a)

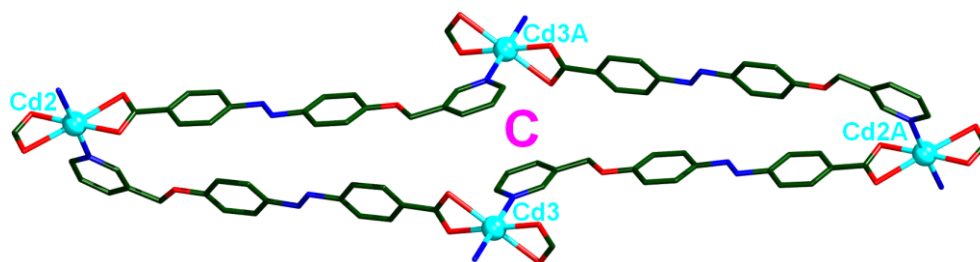

(b)

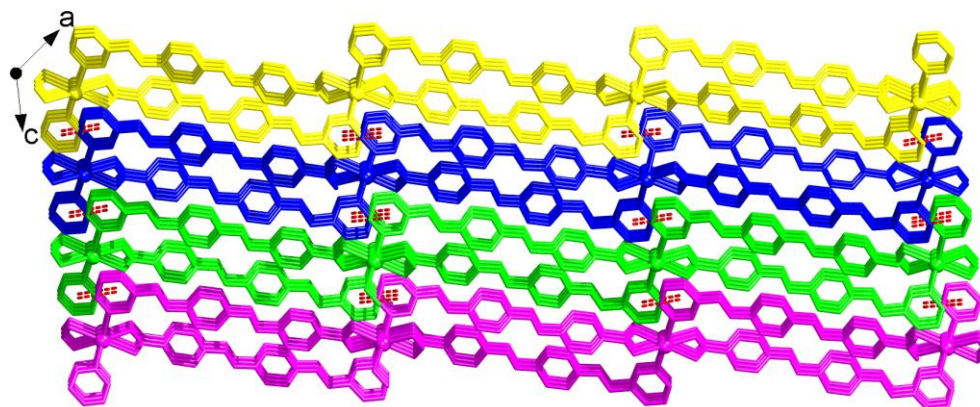

(c)

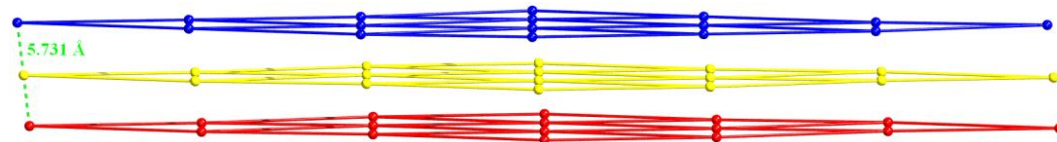

**Figure S4.** (a) View of the metallocyclic  $[Cd_4L_4]$  unit of **3**. (b) View of a 3D supramolecular structure in **3** looking down the *b* axis. (c) View of the separations between the neighboring nets in **2**. Atom color codes: Cd, cyan polyhedrons; O, red; N, blue; C, dark green. All H atoms are omitted for clarity.

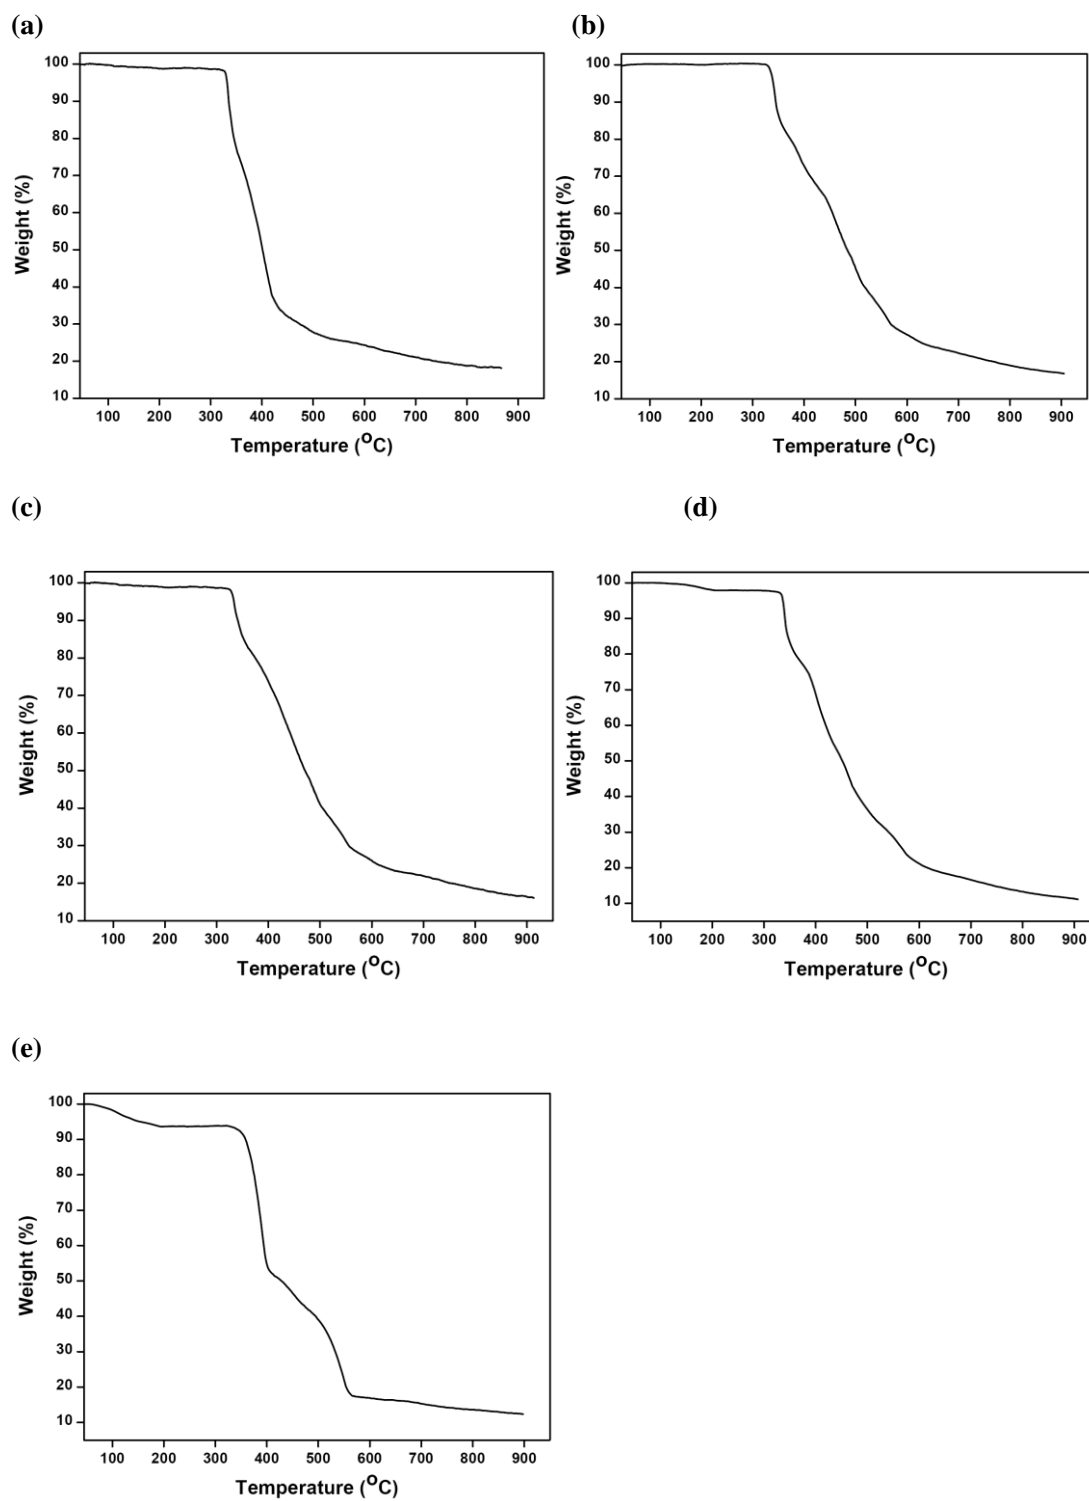

**Figure S5.** TG curves of **1** (a), **2** (b), **3** (c), **4** (d), and **5** (e).

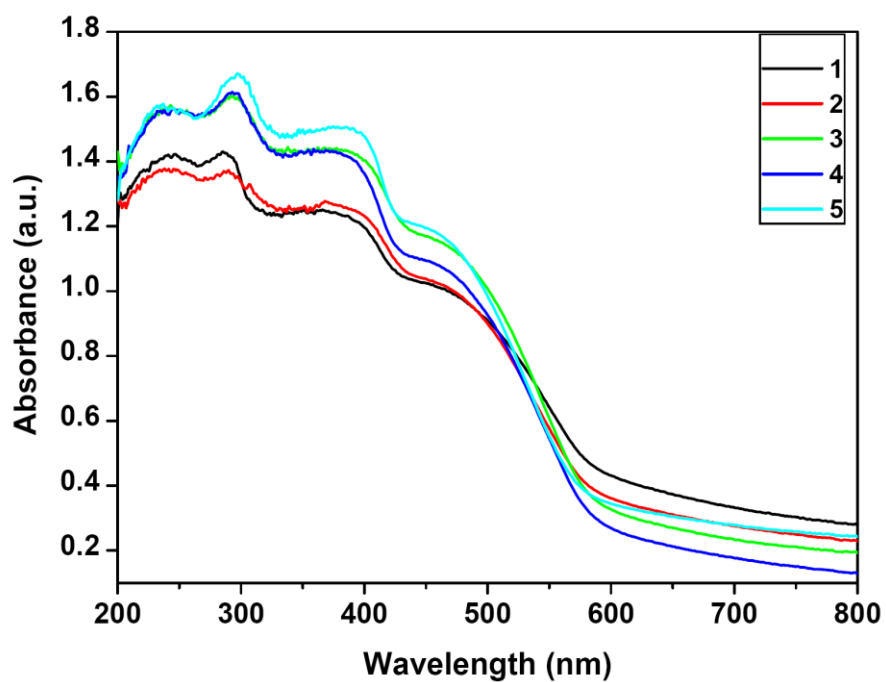

Figure S6. UV-vis adsorption spectra of 1–5 in the solid state at ambient temperature.

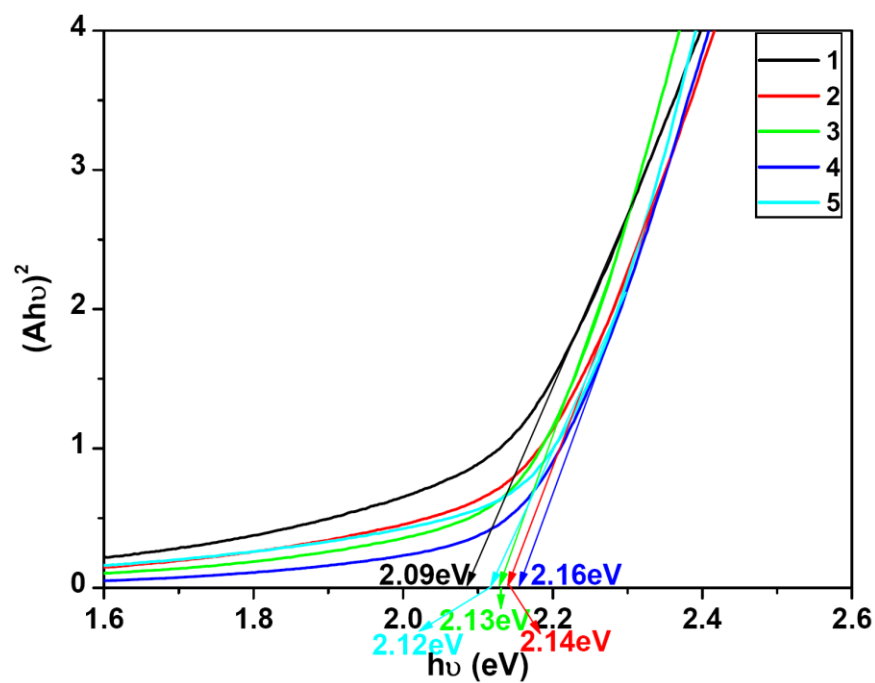

Figure S7.  $(Ah\nu)^2-h\nu$  curves of 1–5.

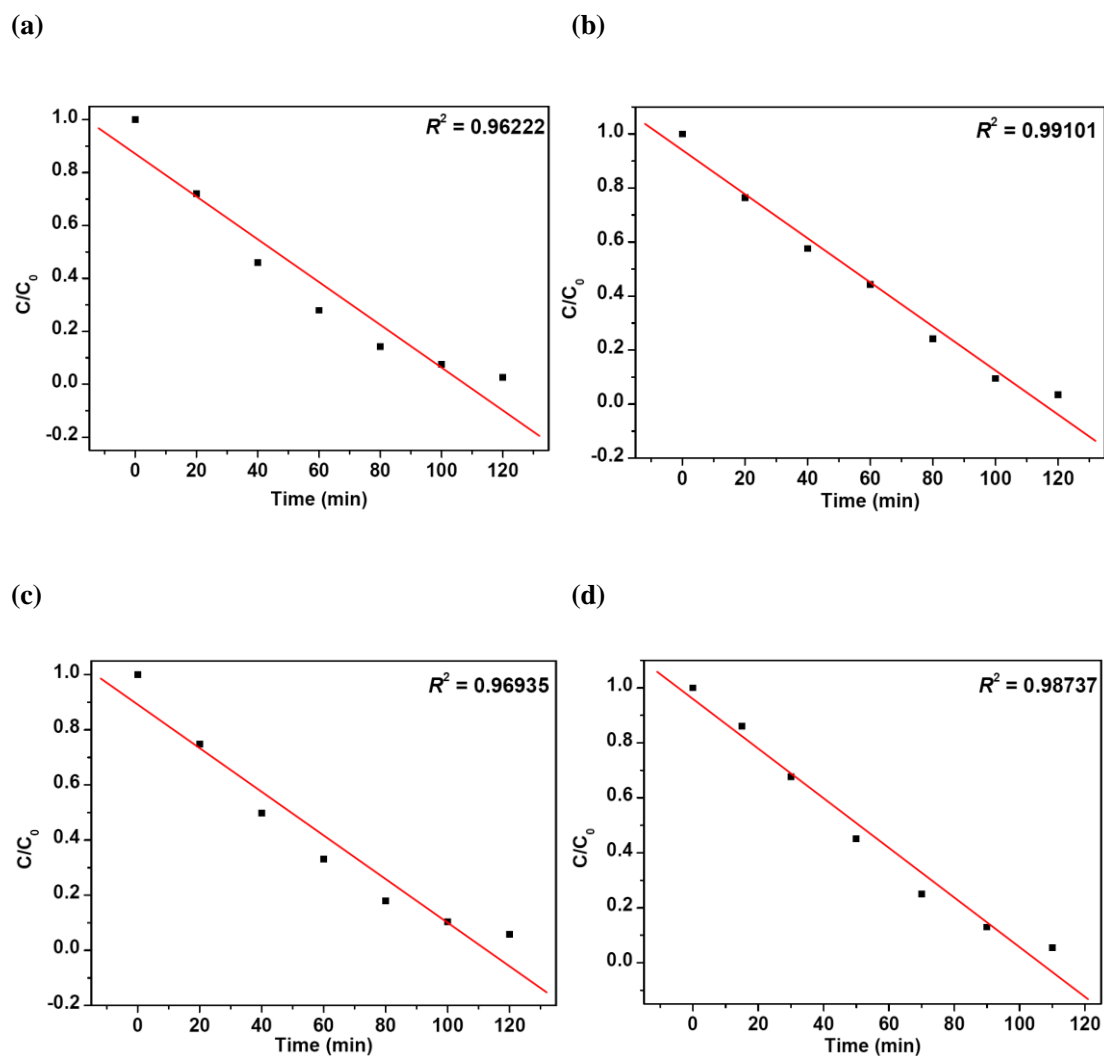

**Figure S8.** (a-d) The pseudo-zero-order plot for the photodegradation of MB in the presence of 1–4 under UV-Vis light irradiation. The square dots and the red line represent the experimental data and the fitted least-square line, respectively.

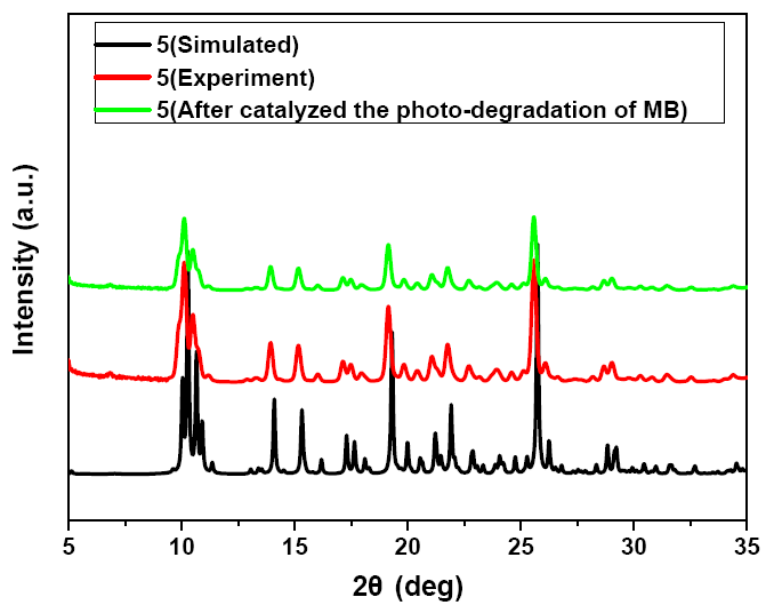

**Figure S9.** The PXRD patterns from simulated single crystal data, of as-synthesized samples, of as-synthesized samples after catalyzed the photo-degradation of MB.

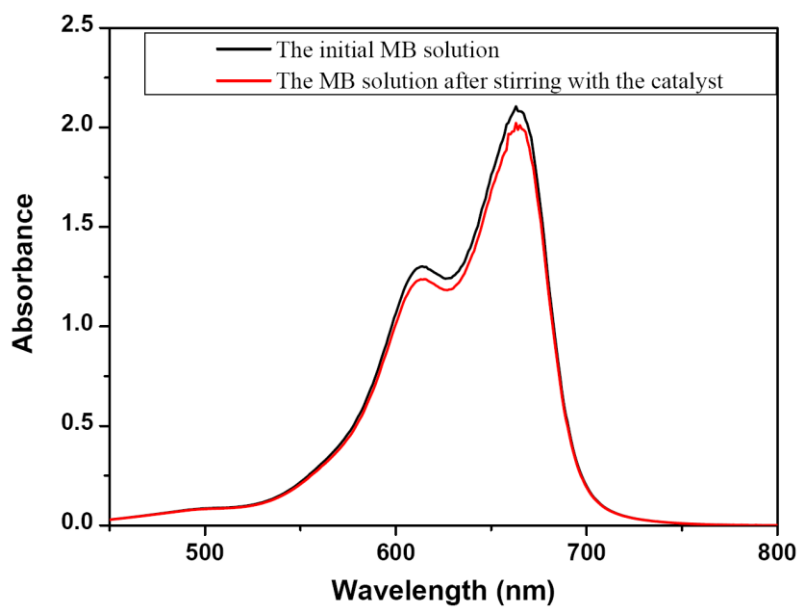

**Figure S10.** The UV-vis adsorption spectra of the initial MB solution and the MB solution after stirring with the catalyst about 30 min.
